# Supplementary material for: In search of evidence for the experience of pain in honeybees: A self-administration study
Source: PubMed Central journal article supplement (PMC5379194; doi:10.1038/srep45825), 2017-04-04
Supplement: srep45825-s1.pdf [file srep45825-s1.pdf]

# In search of evidence for the experience of pain in honeybees: A self-administration study

Julia Groening, Dustin Venini, and Mandyam Srinivasan

## Supplementary Information

**Table S1.** This table gives an overview of the number of bees and cages used in both experiments, including mortality and lost leg clips.

|                                            | Experiment 1:<br>Clip |         | Experiment 2:<br>Amputation |         |
|--------------------------------------------|-----------------------|---------|-----------------------------|---------|
|                                            | Control               | Injured | Control                     | Injured |
| Total number of bees                       | 255                   | 245     | 270                         | 260     |
| Number of bees alive                       | 208                   | 200     | 256                         | 228     |
| Number of dead bees                        | 47                    | 45      | 14                          | 32      |
| Total number of cages                      | 51                    | 49      | 54                          | 52      |
| Number of cages in which all bees survived | 19                    | 20      | 42                          | 28      |
| Number of cages in which bees died         | 32                    | 29      | 12                          | 24      |
| Cages with 1 dead bee                      | 20                    | 15      | 10                          | 17      |
| Cages with 2 dead bees                     | 9                     | 12      | 2                           | 6       |
| Cages with 3 dead bees                     | 3                     | 2       | 0                           | 1       |
| Total number of lost clips                 | NA                    | 33      | NA                          | NA      |
| Cages with 0 lost clips                    | NA                    | 23      | NA                          | NA      |
| Cages with 1 lost clip                     | NA                    | 19      | NA                          | NA      |
| Cages with 2 lost clips                    | NA                    | 7       | NA                          | NA      |

**Table S2.** This table lists the results of all tests performed. Significant results are marked in bold and highlighted in light grey. Wilcoxon = Wilcoxon rank sum test, M = morphine solution, S = pure sucrose solution, T = total solution (M+S).

| Experiment / Group         | Variable                   | Test        | W / X  | df | p-value      | mean X | mean Y |
|----------------------------|----------------------------|-------------|--------|----|--------------|--------|--------|
| <b>Control vs Injured</b>  |                            |             |        |    |              |        |        |
| Clip                       | M consumption (g)          | Wilcoxon    | 1265   | NA | 0.918        | 0.225  | 0.227  |
| Clip                       | S consumption (g)          | Wilcoxon    | 1412   | NA | 0.264        | 0.468  | 0.434  |
| Clip                       | T consumption (g)          | Wilcoxon    | 1345   | NA | 0.512        | 0.693  | 0.661  |
| Clip                       | % M consumption            | Wilcoxon    | 1177   | NA | 0.620        | 0.321  | 0.340  |
| Clip                       | % S consumption            | Wilcoxon    | 1322   | NA | 0.620        | 0.679  | 0.660  |
| Clip                       | % Dead bees                | Chi-squared | 0      | 1  | 1            | 0.184  | 0.184  |
| Clip                       | % Cages w dead bees        | Chi-squared | 0.0256 | 1  | 0.873        | 0.628  | 0.592  |
| <b>Amputation</b>          | <b>M consumption (g)</b>   | Wilcoxon    | 1000   | NA | <b>0.011</b> | 0.196  | 0.246  |
| Amputation                 | S consumption (g)          | Wilcoxon    | 1145   | NA | 0.102        | 0.454  | 0.501  |
| <b>Amputation</b>          | <b>T consumption (g)</b>   | Wilcoxon    | 1051   | NA | <b>0.026</b> | 0.649  | 0.748  |
| Amputation                 | % M consumption            | Wilcoxon    | 1192   | NA | 0.181        | 0.299  | 0.319  |
| Amputation                 | % S consumption            | Wilcoxon    | 1616   | NA | 0.181        | 0.701  | 0.681  |
| <b>Amputation</b>          | <b>% Dead bees</b>         | Chi-squared | 7.6028 | 1  | <b>0.006</b> | 0.052  | 0.123  |
| <b>Amputation</b>          | <b>% Cages w dead bees</b> | Chi-squared | 5.7397 | 1  | <b>0.017</b> | 0.222  | 0.462  |
| <b>Blue vs Yellow</b>      |                            |             |        |    |              |        |        |
| Clip: Control              | M consumption (g)          | Wilcoxon    | 355    | NA | 0.581        | 0.235  | 0.216  |
| Clip: Control              | S consumption (g)          | Wilcoxon    | 237    | NA | 0.100        | 0.439  | 0.496  |
| Clip: Injured              | M consumption (g)          | Wilcoxon    | 318    | NA | 0.713        | 0.237  | 0.216  |
| <b>Clip: Injured</b>       | <b>S consumption (g)</b>   | Wilcoxon    | 193    | NA | <b>0.034</b> | 0.387  | 0.487  |
| Amputation: Control        | M consumption (g)          | Wilcoxon    | 399    | NA | 0.559        | 0.199  | 0.192  |
| <b>Amputation: Control</b> | <b>S consumption (g)</b>   | Wilcoxon    | 170    | NA | <b>0.001</b> | 0.381  | 0.527  |
| <b>Amputation: Injured</b> | <b>M consumption (g)</b>   | Wilcoxon    | 492    | NA | <b>0.004</b> | 0.298  | 0.198  |
| Amputation: Injured        | S consumption (g)          | Wilcoxon    | 318    | NA | 0.730        | 0.489  | 0.513  |

## Experiment 1: Clip

Mortality rate

■ dead ■ alive

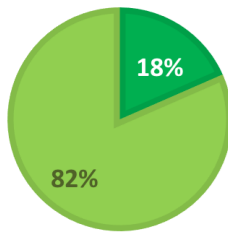

Control (n=255)

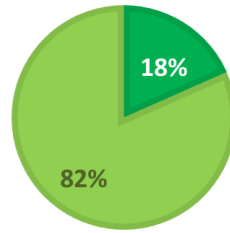

Injured (n=245)

Cages in which...

■ bees died ■ all bees survived

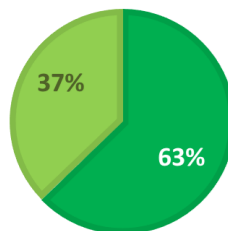

Control (n=51)

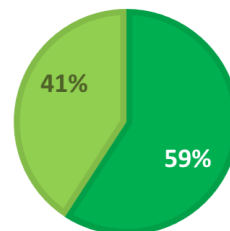

Injured (n=49)

**Figure S1.** Pie charts comparing the mortality rate of the control and the injured bees (top row; n=number of bees), and the percentage of cages in which bees died (bottom row; n=number of cages) in Experiment 1. Mortality was equally high in the injured and control groups (see Supplementary Table S2).

## Experiment 2: Amputation

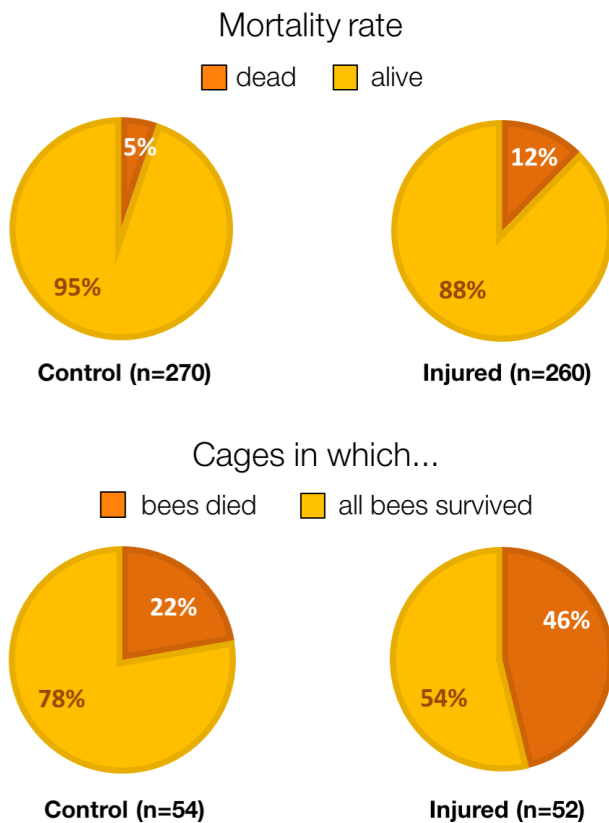

**Figure S2.** Pie charts comparing the mortality rate of the control and the injured bees (top row; n=number of bees), and the percentage of cages in which bees died (bottom row; n=number of cages) in Experiment 2. Deaths occurred significantly more often in the amputated group than in the corresponding control (see Supplementary Table S2).

## Consumption and Feeder Colour

To examine whether the bees' solution intake was influenced by the colour of the feeder, we tested if the amount of morphine and sucrose consumed varied between the blue and the yellow feeders that were used in the experiments.

For the control group of Experiment 1 (Clip), no significant difference in consumption was found between the blue and the yellow feeder (Supplementary Fig. S3). The injured bees, however, drank more sucrose solution when it was offered in the yellow feeder (blue: 0.39g, yellow: 0.49g,  $W=193$ ,  $P=0.034$ ; Supplementary Fig. S4).

In the Amputation Experiment, the control bees showed an increased consumption when the yellow feeder contained sucrose solution (blue: 0.38g, yellow: 0.53g,  $W=170$ ,  $P=0.001$ ; Supplementary Fig. S5). The injured bees in this experiment displayed no colour-dependent sucrose consumption, but they drank more morphine solution when it was provided in a blue feeder (blue: 0.30g, yellow: 0.20g,  $W=492$ ,  $P=0.004$ ; Supplementary Fig. S6).

Taken together, this analysis revealed no consistent colour preference across experiments and groups. Most importantly, the bees showed a preference for sucrose over morphine irrespective of the feeder colour. The morphine to sucrose ratio stayed approximately the same, and this pattern was not overruled when the feeder colours were swapped.

### Experiment 1: Clip, Control Group

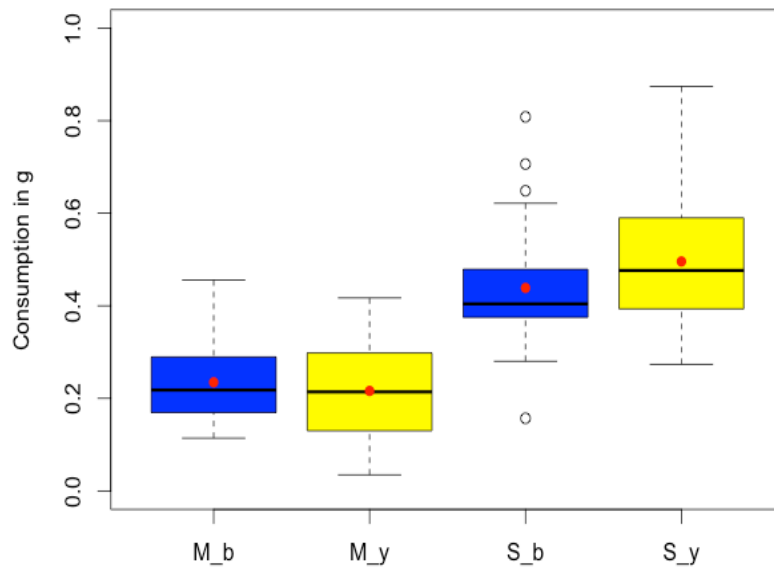

**Figure S3.** Absolute consumption (in g, per bee, over four days) of morphine solution (M) and pure sucrose solution (S) of the control group of Experiment 1 (Clip) in relation to the feeder colour. Consumption is shown separately for the blue (b) (n=25) and the yellow (y) (n=26) feeders. Mean and median values are represented by red dots and horizontal black lines, respectively. No significant difference in consumption was found between the blue and the yellow feeders, either for the morphine solution or the sucrose solution (see Supplementary Table S2).

### Experiment 1: Clip, Injured Group

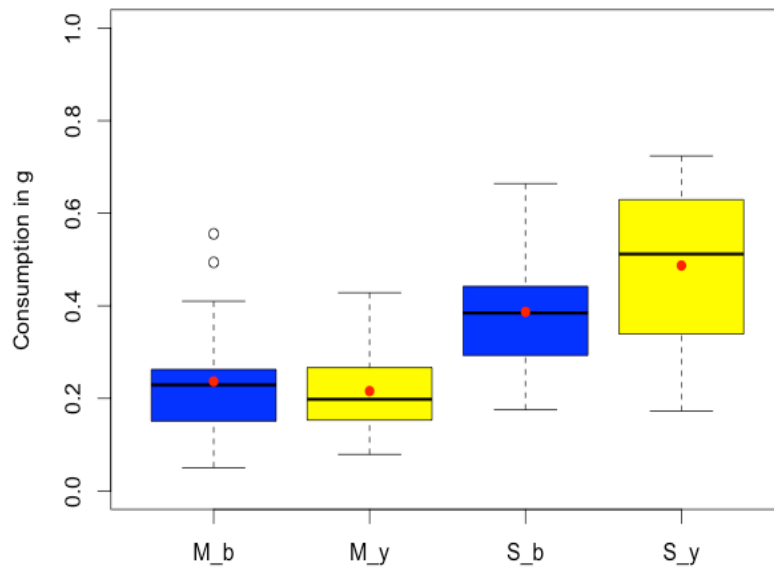

**Figure S4.** Absolute consumption (in g, per bee, over four days) of morphine solution (M) and pure sucrose solution (S) of the injured group of Experiment 1 (Clip) in relation to the feeder colour. Consumption is shown separately for the blue (b) (n=26) and the yellow (y) (n=23) feeders. Mean and median values are represented by red dots and horizontal black lines, respectively. Bees consumed significantly more sucrose solution when it was offered in the yellow feeder. The morphine consumption did not differ significantly between the blue and the yellow feeders (see Supplementary Table S2).

### Experiment 2: Amputation, Control Group

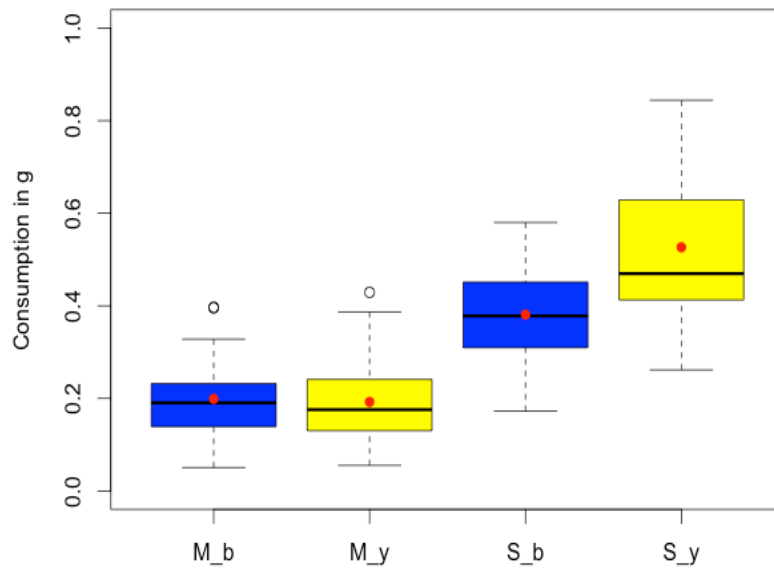

**Figure S5.** Absolute consumption (in g, per bee, over four days) of morphine solution (M) and pure sucrose solution (S) of the control group of Experiment 2 (Amputation) in relation to the feeder colour. Consumption is shown separately for the blue (b) (n=27) and the yellow (y) (n=27) feeders. Mean and median values are represented by red dots and horizontal black lines, respectively. Bees consumed significantly more sucrose solution when it was offered in the yellow feeder. The morphine consumption did not differ significantly between the blue and the yellow feeders (see Supplementary Table S2).



### Experiment 2: Amputation, Injured Group

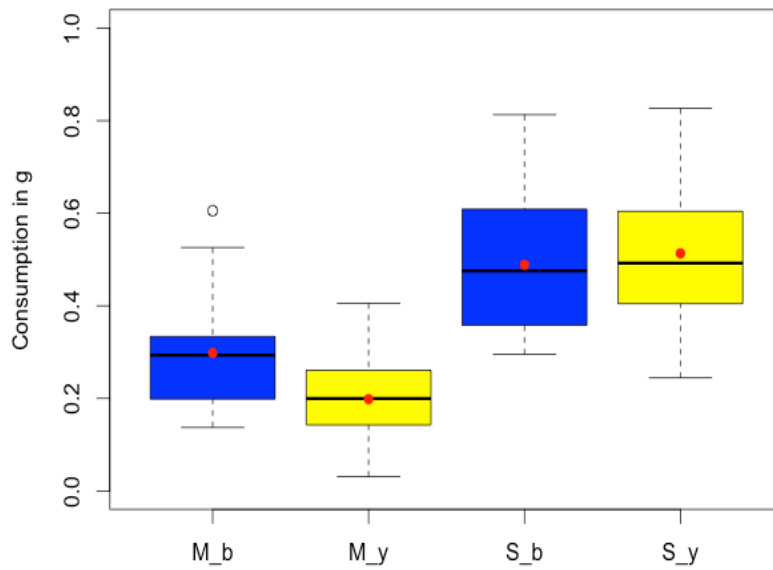

**Figure S6.** Absolute consumption (in g, per bee, over four days) of morphine solution (M) and pure sucrose solution (S) of the injured group of Experiment 2 (Amputation) in relation to the feeder colour. Consumption is shown separately for the blue (b) (n=25) and the yellow (y) (n=27) feeders. Mean and median values are represented by red dots and horizontal black lines, respectively. Bees consumed significantly more morphine solution when it was offered in the blue feeder. The sucrose consumption did not differ significantly between the blue and the yellow feeders (see Supplementary Table S2).
